# Supplementary material for: The Pesticide Chlordecone Promotes Parkinsonism-like Neurodegeneration with Tau Lesions in Midbrain Cultures and C. elegans Worms
Source: MDPI journal article supplement (doi:10.3390/cells12091336), 2023-05-07
Supplement: s1 [file s1]

### Supplementary results (Figures S1, S2)

To assess a possible impact of culture age on chlordecone (CLD)-induced neurotoxicity, we exposed DIV 14 (instead of DIV 7) midbrain cultures to 1-20  $\mu$ M CLD for 5 consecutive days before fixation and processing for immunoanalysis. Similar to observations made in younger midbrain cultures, more mature dopamine (DA) neurons were killed in a concentration-dependent manner after 5 days of chronic treatment with CLD. The  $EC_{50}$  for DA cell loss was estimated at approximately 10  $\mu$ M, a concentration close to that found in younger cultures (Figure S1).

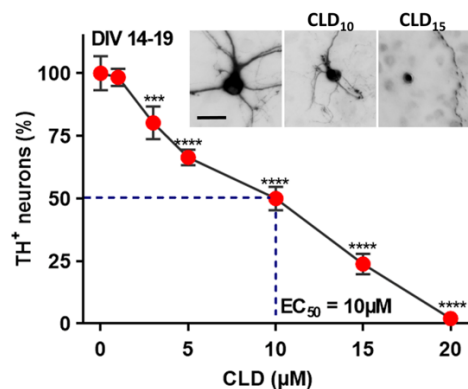

**Figure S1. Impact of culture age on CLD-induced neurotoxicity in midbrain DA neurons.** Survival of DA neurons as a function of increasing CLD concentration (1-20  $\mu$ M) in 2-week midbrain cultures treated with this compound between DIV 14-19 and then assessed for TH immunocytochemistry. Data are means  $\pm$  SEMs ( $n = 6$ ). \*\*\*  $p < 0.001$ , \*\*\*\*  $p < 0.0001$  vs untreated controls. One-way ANOVA followed by Dunnett's test. *Inset*: Representative illustrations showing the morphology of TH<sup>+</sup> neurons in midbrain cultures exposed or not exposed to CLD (10 or 15  $\mu$ M) between DIV 14-19. Scale bar: 20  $\mu$ m.

Next, we tested whether treatments capable to potentially curtail CLD-mediated insults were capable of rescuing CLD-treated DA neurons. We found that the inhibitor of lipid peroxidation, Trolox-C (10  $\mu$ M), the iron chelator desferrioxamine (10  $\mu$ M) and the glutamate NMDA receptor blocker MK-801 (2  $\mu$ M) could not protect DA neurons from a 5-day exposure to 10  $\mu$ M CLD (Figure S2). Increasing the amount of glucose in the culture medium by 50 mM was similarly ineffective.

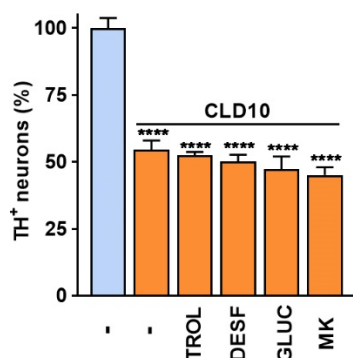

**Figure S2. Evaluation of compounds with the potential to limit CLD neurotoxicity for DA neurons.** Midbrain cultures treated with 10  $\mu$ M CLD between DIV 7-12 in the presence or absence of the inhibitor of lipid peroxidation Trolox-C (TROL; 10  $\mu$ M), the iron chelator desferrioxamine (DESF; 10  $\mu$ M), the NMDA receptor antagonist MK-801 (2  $\mu$ M) or high glucose (GLUC; +50 mM). Data are means  $\pm$  SEM ( $n = 3$ ). \*\*\*  $p < 0.001$  vs untreated control cultures. One-way ANOVA followed by Dunnett's test.
